# Supplementary material for: Real-Time PCR Protocol for Detection and Quantification of Three Pathogenic Members of the Vibrionaceae Family
Source: MDPI journal article supplement (doi:10.3390/microorganisms10102060), 2022-10-18
Supplement: s1 [file s1]

*Article*

# **Real-time PCR protocol for detection and quantification of three pathogenic members of the Vibrionaceae family**

**Cátia Costa<sup>1</sup>, Guilherme D. Ferreira<sup>2</sup>, Marco Simões<sup>1</sup>, Joana L. Silva<sup>3</sup> and Maria J. Campos <sup>2,\*</sup>**

<sup>1</sup> MARE-Marine and Environmental Sciences Centre, 2520-630 Peniche, Portugal

<sup>2</sup> MARE-Marine and Environmental Sciences Centre, ESTM, Polytechnic of Leiria, 2520-630 Peniche, Portugal

<sup>3</sup> Allmicroalgae Natural Products S.A., Rua 25 de Abril, s/n, 2445-413 Pataias Gare, Portugal

\* Correspondence: mcampos@ipleiria.pt



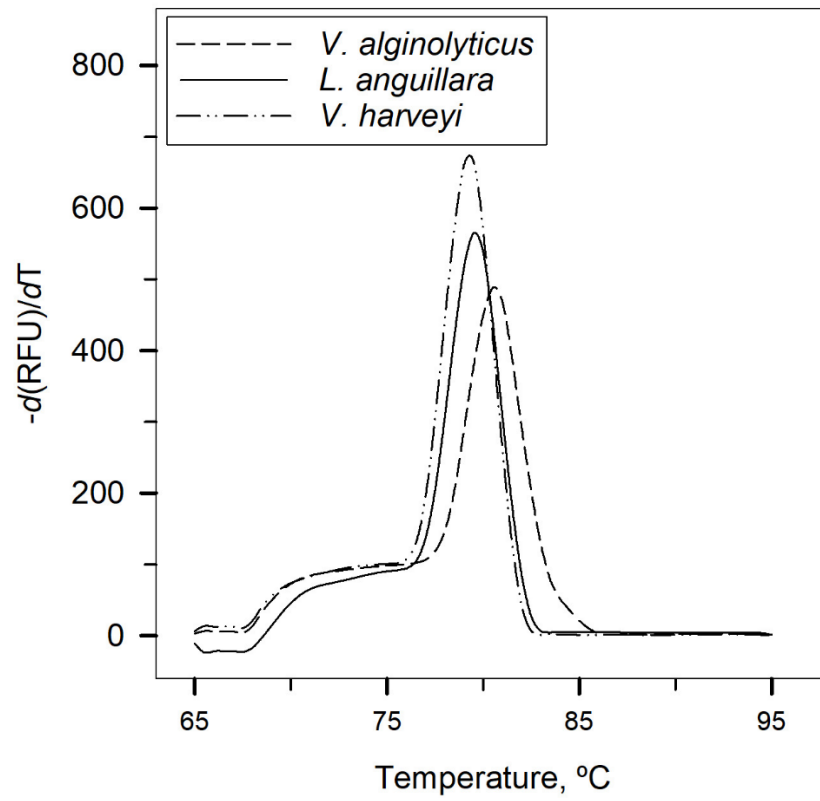

**Figure S2.** Example of melting curves from the three members of the Vibrionaceae family. The peaks are, respectively, 79.3 °C for *Vibrio harveyi*, 79.8 °C for *Listonella anguillara*, and 80.3 °C for *Vibrio alginolyticus*.
